# Supplementary material for: Efficient Capture and Raman Analysis of Circulating Tumor Cells by Nano-Undulated AgNPs-rGO Composite SERS Substrates
Source: PubMed Central journal article supplement (PMC7570931; doi:10.3390/s20185089), 2020-09-07
Supplement: sensors-20-05089-s001.pdf [file sensors-20-05089-s001.pdf]

## Supplementary Materials

# Efficient Capture and Raman Analysis of Circulating Tumor Cells by Nano-Undulated AgNPs-rGO Composite SERS Substrates

Jong-Eun Park <sup>1,†</sup>, Nuri Oh <sup>2,3,†</sup>, Hyeono Nam <sup>1</sup>, Ji-Ho Park <sup>2</sup>, Sanha Kim <sup>1</sup>, Jessie S. Jeon <sup>1,\*</sup> and Minyang Yang <sup>1,4,\*</sup>

<sup>1</sup> Department of Mechanical Engineering, Korea Advanced Institute of Science and Technology, Daejeon 34141, Republic of Korea; pje7031@kaist.ac.kr (J.-E.P.); namtree@kaist.ac.kr (H.N.); sanhkim@kaist.ac.kr (S.K.); jsjeon@kaist.ac.kr (J.S.J.); myyang@kaist.ac.kr (M.Y.)

<sup>2</sup> Department of Bio and Brain Engineering, Korea Advanced Institute of Science and Technology, Daejeon 34141, Republic of Korea; ohnuri@kaist.ac.kr (N.O.); jihopark@kaist.ac.kr (J.-H.P.)

<sup>3</sup> Center for Systems Biology, Massachusetts General Hospital, Boston, Massachusetts 02114, United States; ohnuri@kaist.ac.kr (N.O.)

<sup>4</sup> Department of Mechanical Engineering, State University of New York Korea, Incheon 21985, Republic of Korea; minyang.yang@sunykorea.ac.kr (M.Y.)

\* Correspondence: jsjeon@kaist.ac.kr (J.S.J.); myyang@kaist.ac.kr (M.Y.)

† These authors contributed equally to this work.

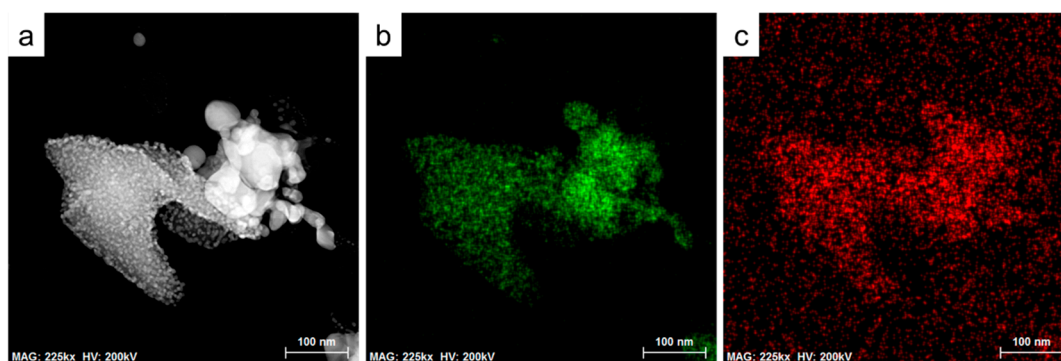

**Figure S1.** (a) HAADF-STEM image of the AgNPs-rGO composite; Corresponding elemental maps of silver (b); carbon (c).

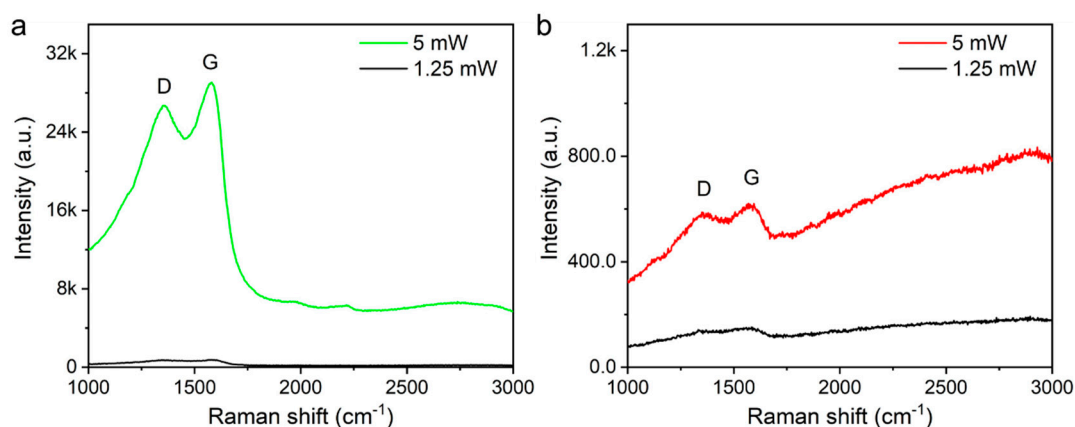

**Figure S2.** Raman spectra of the AgNPs-rGO1 substrate with high and low input laser power at wavelength of 514 nm (a); 633 nm (b). The raw data was shown for the background verification.

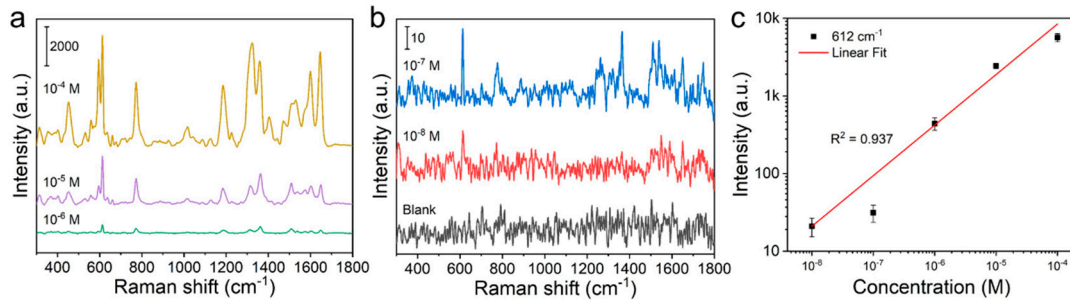

**Figure S3.** (a,b) Raman spectra of R6G solutions with different concentrations on the AgNPs-rGO1 SERS substrates; (c) Intensity plot of the  $612\text{ cm}^{-1}$  as a function of R6G concentration in logarithmic scale. Red line is the linear regression equation.

For the enhancement factor (EF) calculation,  $I_{\text{SERS}} = 20.97$ ,  $I_{\text{bulk}} = 580.27$  at  $612\text{ cm}^{-1}$ .  $N_{\text{bulk}}$  was calculated as follows [1],

$$N_{\text{bulk}} = Ah\rho/M \quad (1)$$

where  $A$  is the laser spot area ( $1.81\text{ }\mu\text{m}^2$ ),  $h$  is the laser penetration depth ( $22.9\text{ }\mu\text{m}$  for  $633\text{ nm}$ ),  $\rho$  and  $M$  are the density ( $1.26\text{ g/cm}^3$ ) and molecular weight ( $479.02\text{ g/mol}$ ) of R6G, respectively. Thus,  $N_{\text{bulk}} = 1.09 \times 10^{-13}\text{ mol}$ .

$N_{\text{SERS}}$  was calculated as below [1],

$$N_{\text{SERS}} = CVA/S \quad (2)$$

where  $C$  is the R6G concentration ( $10\text{ nM}$ ),  $V$  is the sample volume ( $1\text{ }\mu\text{L}$ ),  $A$  is the laser spot area ( $1.81\text{ }\mu\text{m}^2$ ), and  $S$  is the sample area ( $2.24\text{ mm}^2$ ). Thus,  $N_{\text{SERS}} = 8.08 \times 10^{-21}\text{ mol}$ .

Based on the calculation,  $\text{EF} = (20.97/580.27) \times (1.09 \times 10^{-13}) / (8.08 \times 10^{-21}) = 4.88 \times 10^5$ .

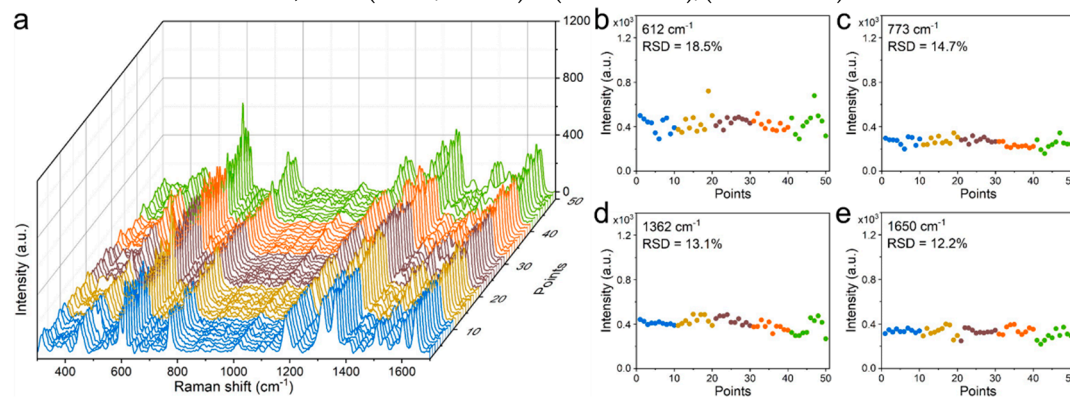

**Figure S4.** Reproducibility of the AgNPs-rGO1 SERS substrate. (a) SERS spectra of R6G from randomly selected 50 points. Five samples were measured with 10 points per the each sample; SERS intensity distribution of the R6G at the Raman peaks of  $612\text{ cm}^{-1}$  (b);  $773\text{ cm}^{-1}$  (c);  $1362\text{ cm}^{-1}$  (d);  $1650\text{ cm}^{-1}$  (e). Different colors represent the five each sample.

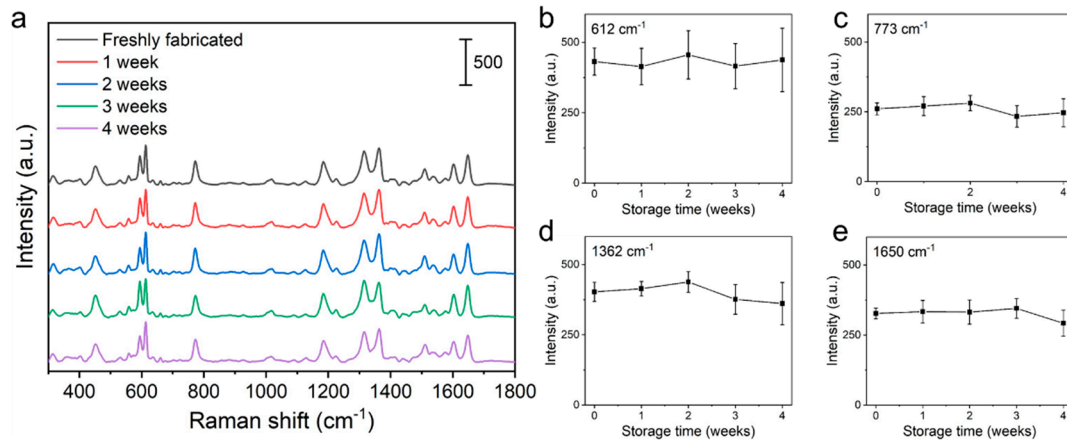

**Figure S5.** Stability test of the AgNPs-rGO1 SERS substrate. **(a)** The SERS spectra of 1 μM R6G solutions during a month; **(b–e)** The SERS intensity of R6G at the 612 cm<sup>-1</sup>, 773 cm<sup>-1</sup>, 1362 cm<sup>-1</sup>, and 1650 cm<sup>-1</sup> over time.

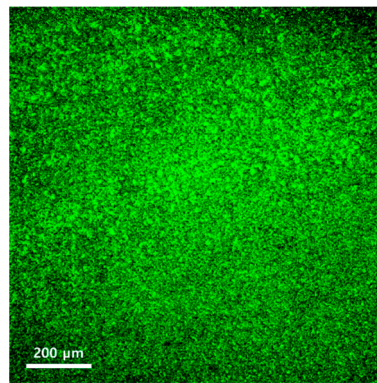

**Figure S6.** Alexa Fluor 488 dye conjugated antibodies on the substrates. The anti-EpCAM antibodies was functionalized on the substrate through avidin-biotin interaction. The functionalization layer with thickness of ~10 nm involving the uniformly distributed antibodies adhere to the cell surface of 3-D structure resulting in the Raman enhancement of cell components near the substrates.

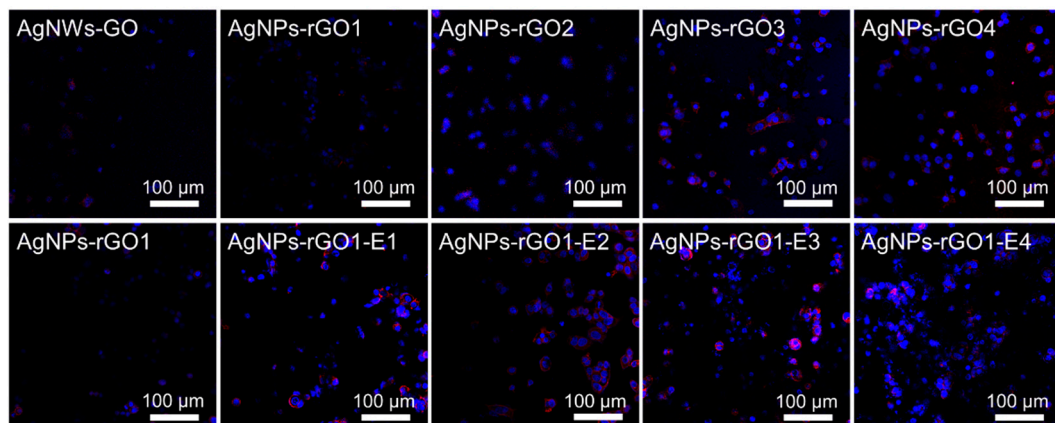

**Figure S7.** Fluorescence microscope images of the MCF7 cells stained with DAPI (blue) for nuclei and rhodamine-phalloidin (red) for actin filaments on the various SERS substrates after 1 hour capture time. The SERS substrates were fabricated using the AgNWs-GO mixture films with the different GO contents (top) and different applied electric fields during the process (bottom).

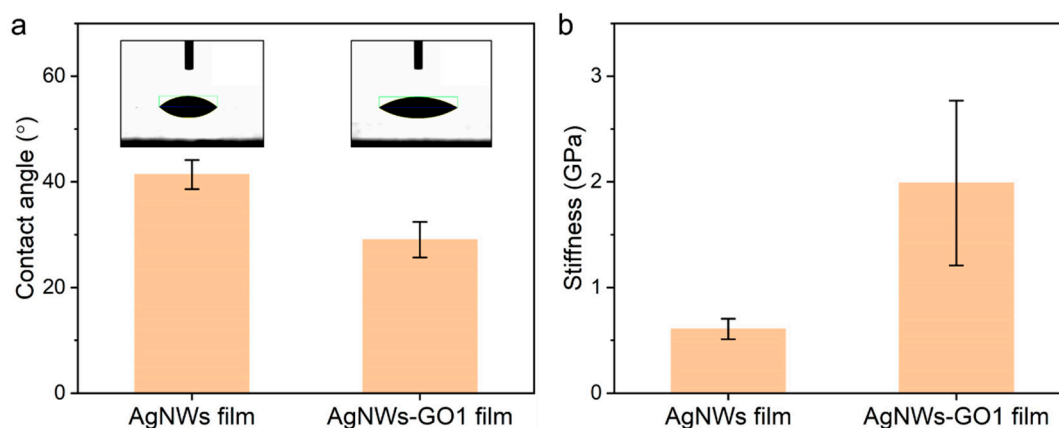

**Figure S8.** (a) Contact angle of the AgNWs film and the AgNWs-GO1 film. Inset photographs are water droplets on the films; (b) Stiffness of the AgNWs film and the AgNWs-GO1 film. The films were tested in indent depth of 100 nm.

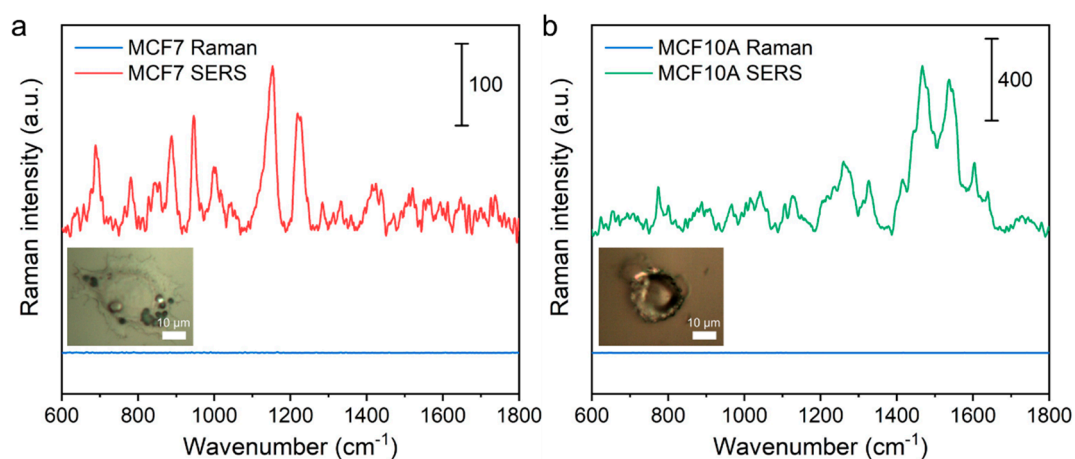

**Figure S9.** Comparison of the enhanced and non-enhanced Raman spectra. (a) Raman spectrum of a MCF7 cell on the AgNPs-rGO1 SERS substrate (red line) and on a microscope slide (blue line); (b) Raman spectrum of a MCF10A cell on the AgNPs-rGO1 SERS substrate (green line) and on a microscope slide (blue line). Inset is the MCF7 and MCF10A cell on the microscope slides.

**Table S1.** Comparison of LOD of R6G and the other methods.

|     | Liquid Chromatography | Solid-phase Extraction   | Fluorescence Sensor | Other SERS Method | This Work |
|-----|-----------------------|--------------------------|---------------------|-------------------|-----------|
| LOD | 2.7 nM [2]            | 2.1 μg/L [3]<br>(4.4 nM) | 0.26 μM [4]         | 0.1 nM [5]        | 2.0 nM    |

Table S2. Molecular assignment of Raman bands of the MCF7 and MCF10A cells.

| Raman Shift<br>(cm <sup>-1</sup> ) | Molecular Assignment                                                                           | Cell Type       | References |
|------------------------------------|------------------------------------------------------------------------------------------------|-----------------|------------|
| 621                                | C-C twisting mode of phenylalanine (proteins)                                                  | MCF7            | 6,7,8      |
| 630                                | Glycerol                                                                                       | MCF10A          | 9          |
| 662                                | C-S stretching mode of cystine (collagen type I)                                               | MCF10A          | 6,10       |
| 702                                | Cholesterol, cholesterol ester                                                                 | MCF7            | 9          |
| 709                                | $\nu(\text{C-S})$ trans (amino acid methionine)                                                | MCF10A          | 11         |
| 782                                | Thymine, cytosine, uracil                                                                      | MCF7            | 8          |
| 802                                | Uracil-based ring breathing mode                                                               | MCF10A          | 12         |
| 831                                | Asymmetric O-P-O stretching, tyrosine                                                          | MCF10A          | 13         |
| 842                                | Glucose                                                                                        | MCF7            | 7          |
| 877                                | C-C-N <sup>+</sup> symmetric stretching (lipids)                                               | MCF10A          | 8          |
| 883                                | $\rho(\text{CH}_2)$ (protein assignment)                                                       | MCF7            | 14         |
| 893                                | Backbone, C-C skeletal                                                                         | MCF10A          | 13         |
| 957                                | Hydroxyapatite, carotenoid, cholesterol                                                        | MCF10A          | 7          |
| 970                                | Phosphate monoester groups of phosphorylated proteins and cellular nucleic acids               | MCF7            | 15         |
| 980                                | C-C stretching $\beta$ -sheet (proteins)                                                       | MCF10A          | 8          |
| 1003                               | Phenylalanine, C-C skeletal                                                                    | MCF7            | 13         |
| 1007                               | Phenylalanine, carbamide                                                                       | MCF10A          | 16         |
| 1040                               | Formalin peaks appearing in the fixed normal and tumor tissues                                 | MCF7            | 17         |
| 1043                               | Proline (collagen assignment)                                                                  | MCF10A          | 18,19      |
| 1131                               | Fatty acid                                                                                     | MCF7,<br>MCF10A | 9          |
| 1155                               | C-C (and C-N) stretching of proteins (also carotenoids)                                        | MCF7            | 6,7        |
| 1173                               | Tyrosine (collagen type I)                                                                     | MCF10A          | 9          |
| 1237                               | Amide III and CH <sub>2</sub> wagging vibrations from glycine backbone and proline side chains | MCF7            | 15         |
| 1330                               | Typical phospholipids                                                                          | MCF7            | 20         |
| 1350                               | Carbon particle                                                                                | MCF10A          | 21         |
| 1359                               | Tryptophan                                                                                     | MCF10A          | 10         |
| 1409                               | $\nu_s \text{COO}^-$                                                                           | MCF10A          | 22         |
| 1413                               | $\nu(\text{C=O})\text{O}^-$ (amino acids, aspartic and glutamic acid)                          | MCF7            | 11         |
| 1445                               | CH <sub>2</sub> CH <sub>3</sub> bending modes of collagen and phospholipids                    | MCF10A          | 23,24      |
| 1472                               | Paraffin                                                                                       | MCF7            | 15         |
| 1525                               | In-plane vibrations of the conjugated -C=C-                                                    | MCF10A          | 25         |
| 1528                               | Carotenoid (absent in normal tissues)                                                          | MCF7            | 26         |
| 1554                               | Amide II                                                                                       | MCF10A          | 27         |
| 1573                               | Guanine, adenine, TRP (protein)                                                                | MCF7            | 7          |
| 1585                               | C=C olefinic stretch (protein assignment)                                                      | MCF7            | 28         |
| 1602                               | Phenylalanine                                                                                  | MCF10A          | 23         |
| 1607                               | Tyrosine, phenylalanine ring vibration                                                         | MCF7            | 22         |
| 1653                               | Lipid (C=C stretch)                                                                            | MCF10A          | 7          |
| 1656                               | Amide I (proteins)                                                                             | MCF7            | 22         |
| 1725                               | C=O lipids                                                                                     | MCF10A          | 29         |
| 1738                               | Lipids                                                                                         | MCF7            | 15         |
| 1745                               | Lipids                                                                                         | MCF10A          | 30         |

## References

1. Rao, V. K.; Radhakrishnan, T. P. Tuning the SERS response with Ag-Au nanoparticle-embedded polymer thin film substrates. *Appl. Mater. Interfaces* **2015**, *7*, 12767–12773.
2. Xie, J.; Xie, J.; Deng, J.; Fang, X.; Zhao, H.; Qian, D.; Wang, H. Computational design and fabrication of core-shell magnetic molecularly imprinted polymer for dispersive micro-solid-phase extraction coupled with high-performance liquid chromatography for the determination of rhodamine 6G. *J. Sep. Sci.* **2016**, *39*, 2422–2430.
3. Chao, Y.; Pang, J.; Yan, B.; Wu, P.; Luo, J.; He, J.; Jin, Y.; Li, X.; Xiong, J.; Li, H.; Zhu, W. Graphene-like BN@SiO<sub>2</sub> nanocomposites as efficient sorbents for solid-phase extraction of Rhodamine B and Rhodamine 6G from food samples. *Food Chem.* **2020**, *320*, 126666.
4. Li, Y.; He, W.; Peng, Q.; Hou, L.; He, J.; Li, K. Aggregation-induced emission luminogen based molecularly imprinted ratiometric fluorescence sensor for the detection of Rhodamine 6G in food samples. *Food Chem.* **2019**, *287*, 55–60.
5. Fan, W.; Lee, Y. H.; Pedireddy, S.; Zhang, Q.; Liu, T.; Ling, X. Y. Graphene oxide and shape-controlled silver nanoparticle hybrids for ultrasensitive single-particle surface-enhanced Raman scattering (SERS) sensing. *Nanoscale* **2014**, *6*, 4843–4851.
6. Stone, N.; Kendall, C.; Shepherd, N.; Crow, P.; Barr, H. Near-infrared Raman spectroscopy for the classification of epithelial pre-cancers and cancers. *J. Raman Spectrosc.* **2002**, *33*, 564–573.
7. Stone, N.; Kendall, C.; Smith, J.; Crow, P.; Barr, H. Raman spectroscopy for identification of epithelial cancers. *Faraday Discuss.* **2004**, *126*, 141–157.
8. Liu, Z.; Davis, C.; Cai, W.; He, L.; Chen, X.; Dai, H. Circulation and long-term fate of functionalized, biocompatible single-walled carbon nanotubes in mice probed by Raman spectroscopy. *Proc. Natl. Acad. Sci. Unit. States Am.* **2008**, *105*, 1410–1415.
9. Krafft, C.; Neudert, L.; Simat, T.; Salzer, R. Near infrared Raman spectra of human brain lipids. *Spectrochim. Acta Mol. Biomol. Spectrosc.* **2005**, *61*, 1529–1535.
10. Cheng, W. T.; Liu, M. T.; Liu, H. N.; Lin, S. Y. Micro-Raman spectroscopy used to identify and grade human skin pilomatrixoma. *Microsc. Res. Tech.* **2005**, *68*, 75–79.
11. Kendall, C.; Day, J.; Hutchings, J.; Smith, B.; Shepherd, N.; Barr, H.; Stone, N. Evaluation of Raman probe for oesophageal cancer diagnostics. *Analyst* **2010**, *135*, 3038–3041.
12. Chan, J. W.; Taylor, D. S.; Zwerdling, T.; Lane, S. M.; Ihara, K.; Huser, T. Micro-Raman spectroscopy detects individual neoplastic and normal hematopoietic cells. *Biophys. J.* **2006**, *90*, 648–656.
13. Bhattacharjee, T.; Kumar, P.; Maru, G.; Ingle, A.; Krishna, C. M. Swiss bare mice: A suitable model for transcutaneous in vivo Raman spectroscopic studies of breast cancer. *Laser. Med. Sci.* **2014**, *29*, 325–333.
14. Dukor, R. K. Vibrational spectroscopy in the detection of cancer. *Handb. of Vib. Spectrosc.* **2001**.
15. Li, X.; Yang, T.; Li, S.; Yu, T. Surface-enhanced Raman spectroscopy differences of saliva between lung cancer patients and normal people. *Conf. on Clinical and Biomedical Spectroscopy and Imaging II* **2011**, Munich, Germany, May 22.
16. Notingher, I.; Green, C.; Dyer, C.; Perkins, E.; Hopkins, N.; Lindsay, C.; Hench, L. L. Discrimination between ricin and sulphur mustard toxicity in vitro using Raman spectroscopy. *J. R. Soc. Interface* **2004**, *1*, 79–90.
17. Bonnier, F.; Byrne, H. J. Understanding the molecular information contained in principal component analysis of vibrational spectra of biological systems. *Anal.* **2012**, *137*, 2.
18. Frank, C. J.; McCreery, R. L.; Redd, D. C. B. Raman-spectroscopy of normal and diseased human breast tissues. *Anal. Chem.* **1995**, *67*, 777–783.
19. Malini, R.; Venkatakrisna, K.; Kurien, J.; Pai, K. M.; Rao, L.; Kartha, V. B.; Krishna, C. M. Discrimination of normal, inflammatory, premalignant, and malignant oral tissue: A Raman spectroscopy study. *Biopolym.* **2006**, *81*, 179–193.
20. Min, Y. K.; Yamamoto, T.; Kohda, E.; Ito, T.; Hamaguchi, H. 1064 nm near-infrared multichannel Raman spectroscopy of fresh human lung tissues. *J. Raman Spectrosc.* **2005**, *36*, 73–76.
21. Lakshmi, R. J.; Kartha, V. B.; Krishna, C. M.; Solomon, J. G. R.; Ullas, G.; Devi, P. U. Tissue Raman spectroscopy for the study of radiation damage: Brain irradiation of mice. *Radiat. Res.* **2002**, *157*, 175–182.
22. Shetty, G.; Kendall, C.; Shepherd, N.; Stone, N.; Barr, H. Raman spectroscopy: Elucidation of biochemical changes in carcinogenesis of oesophagus. *Br. J. Cancer* **2006**, *94*, 1460–1464.

23. Huang, Z. W.; McWilliams, A.; Lui, H.; McLean, D. I.; Lam, S.; Zeng, H. S. Near-infrared Raman spectroscopy for optical diagnosis of lung cancer. *Int. J. Cancer* **2003**, *107*, 1047–1052.
24. Feng, S.; Pan, J.; Wu, Y.; Lin, D.; Chen, Y.; Xi, G.; Lin, J.; Chen, R. Study on gastric cancer blood plasma based on surface-enhanced Raman spectroscopy combined with multivariate analysis. *Sci. China C Life Sci.* **2011**, *54*, 828–834.
25. Puppels, G. J.; Garritsen, H. S. P.; Kummer, J. A.; Greve, J. Carotenoids located in human lymphocyte subpopulations and natural-killer-cells by Raman microspectroscopy. *Cytom.* **1993**, *14*, 251–256.
26. Mahadevan-Jansen, A.; Richards-Kortum, R. Raman spectroscopy for cancer detection: A review. *International Conference of the IEEE Engineering in Medicine and Biology Society* **1997**, Chicago, IL, October 30–November 2.
27. O Faolain, E.; Hunter, M. B.; Byrne, J. M.; Kelehan, P.; McNamara, M.; Byrne, H. J.; Lyng, F. M. A study examining the effects of tissue processing on human tissue sections using vibrational spectroscopy. *Vib. Spectrosc.* **2005**, *38*, 121–127.
28. Sahu, A.; Dalal, K.; Naglot, S.; Aggarwal, P.; Krishna, C. M. Serum based diagnosis of asthma using Raman spectroscopy: An early phase pilot study. *PLoS ONE* **2013**, *8*, e78921.
29. Huang, N. Y.; Short, M.; Zhao, J. H.; Wang, H. Q.; Lui, H.; Korbelik, M.; Zeng, H. S. Full range characterization of the Raman spectra of organs in a murine model. *Opt. Express* **2011**, *19*, 22892–22909.
30. Ronen, S. M.; Stier, A.; Degani, H. NMR-studies of the lipid-metabolism of T47d human breast-cancer spheroids. *FEBS Lett.* **1990**, *266*, 147–149.
